# Supplementary material for: Efficacy of Fosfomycin against Planktonic and Biofilm-Associated MDR Uropathogenic Escherichia coli Clinical Isolates
Source: MDPI journal article supplement (doi:10.3390/tropicalmed7090235), 2022-09-08
Supplement: s1 [file s1]

Table S1. Resistance profile of MDR UPEC.

| ID UPEC | Penicillins | Penicillins + beta-lactamase inhibitors | Antipseudomonal penicillins + beta-lactamase inhibitors | Extended-spectrum cephalosporins; 3rd and 4th generation cephalosporins | Non-extended spectrum cephalosporins; 1st and 2nd generation cephalosporins | Cephamycins | Aminoglycosides | Carbapenems   | Fluoroquinolones | Folate pathway inhibitors | Monobactams | Glycylcyclines | Tetracyclines | Phenicol | Phosphonic acids | Polymyxins | Number of drugs to which UPEC is resistant | Number of chemical groups to which UPEC showed resistant at least one antimicrobial | Type of biofilm producer |
|---------|-------------|-----------------------------------------|---------------------------------------------------------|-------------------------------------------------------------------------|-----------------------------------------------------------------------------|-------------|-----------------|---------------|------------------|---------------------------|-------------|----------------|---------------|----------|------------------|------------|--------------------------------------------|-------------------------------------------------------------------------------------|--------------------------|
| 120     | AMP, PIP    | SAM                                     | TZP                                                     | FEP, CTX, CRO, CAZ                                                      | CFX                                                                         | CTT         | AMK, GEN, TOB   | IPM, ETP      | LVX, CIP         | SXT                       | ATM         | TGG            | TET           |          |                  |            | 21                                         | 13                                                                                  | M                        |
| 76      | AMP, PIP    | SAM                                     |                                                         | FEP, CTX, CRO, CAZ                                                      | CFX                                                                         |             | GEN, TOB        |               | LVX, CIP         | SXT                       | ATM         |                | TET           | CLO      | FOF              | CST        | 18                                         | 12                                                                                  | M                        |
| 77      | AMP, PIP    | SAM                                     | TZP                                                     | FEP, CTX, CRO, CAZ                                                      | CFX                                                                         |             | AMK, TOB        |               | LVX, CIP         | SXT                       | ATM         |                | TET           | CLO      | FOF              |            | 18                                         | 12                                                                                  | S                        |
| 126     | AMP, PIP    | SAM                                     | TZP                                                     | FEP, CTX, CRO, CAZ                                                      | CFX                                                                         |             | TOB             | IPM           | LVX, CIP         | SXT                       | ATM         |                | TET           | CLO      |                  |            | 17                                         | 12                                                                                  | S                        |
| 11      | AMP, PIP    | SAM                                     |                                                         | FEP, CTX, CRO, CAZ                                                      | CFX                                                                         | CTT         | AMK, TOB, GEN   | IPM, MEM, ETP | LVX, CIP         | SXT                       | ATM         |                | TET           |          |                  |            | 20                                         | 11                                                                                  | W                        |
| 87      | AMP, PIP    | SAM                                     | TZP                                                     | FEP, CTX, CRO, CAZ                                                      | CFX                                                                         |             | AMK, GEN, TOB   |               | LVX, CIP         | SXT                       | ATM         |                | TET           | CLO      |                  |            | 18                                         | 11                                                                                  | M                        |
| 138     | AMP, PIP    | SAM                                     | TZP                                                     | FEP, CTX, CRO, CAZ                                                      | CFX                                                                         |             | AMK, GEN, TOB   |               | LVX, CIP         | SXT                       | ATM         |                | TET           | CLO      |                  |            | 18                                         | 11                                                                                  | S                        |
| 142     | AMP, PIP    | SAM                                     | TZP                                                     | FEP, CTX, CRO, CAZ                                                      | CFX                                                                         | CTT         | AMK, GEN, TOB   |               | LVX, CIP         | SXT                       | ATM         |                | TET,          |          |                  |            | 18                                         | 11                                                                                  | M                        |
| 1       | AMP, PIP    | SAM                                     | TZP                                                     | FEP, CTX, CRO, CAZ                                                      | CFX                                                                         |             | AMK, GEN, TOB   |               | LVX, CIP         |                           | ATM         |                | TET           |          | FOF              |            | 17                                         | 11                                                                                  | W                        |
| 16      | AMP, PIP    | SAM                                     | TZP                                                     | FEP, CTX, CRO, CAZ                                                      | CFX                                                                         |             | AMK, TOB        |               | LVX, CIP         | SXT                       | ATM         |                | TET           | CLO      |                  |            | 17                                         | 11                                                                                  | W                        |
| 109     | AMP, PIP    | SAM                                     | TZP                                                     | FEP, CTX, CRO, CAZ                                                      | CFX                                                                         |             | AMK, TOB        |               | LVX, CIP         | SXT                       | ATM         |                | TET           | CLO      |                  |            | 17                                         | 11                                                                                  | M                        |
| 3       | AMP, PIP    | SAM                                     | TZP                                                     | FEP, CTX, CRO, CAZ                                                      | CFX                                                                         |             |                 | IPM           | LVX, CIP         | SXT                       | ATM         |                | TET           |          | FOF              |            | 16                                         | 11                                                                                  | S                        |
| 118     | AMP, PIP    | SAM                                     | TZP                                                     | FEP, CTX, CRO, CAZ                                                      | CFX                                                                         | CTT         |                 |               | LVX, CIP         | SXT                       | ATM         |                | TET           | CLO      |                  |            | 16                                         | 11                                                                                  | M                        |
| 140     | AMP, PIP    | SAM                                     | TZP                                                     | FEP, CTX, CRO, CAZ                                                      | CFX                                                                         | CTT         |                 | IPM           | LVX, CIP         | SXT                       | ATM         |                | TET           |          |                  |            | 16                                         | 11                                                                                  | M                        |
| 18      | AMP, PIP    | SAM                                     | TZP                                                     | FEP, CTX, CRO, CAZ                                                      | CFX                                                                         |             | AMK, GEN, TOB   |               | LVX, CIP         | SXT                       | ATM         |                | TET           |          |                  |            | 17                                         | 10                                                                                  | W                        |
| 29      | AMP, PIP    |                                         |                                                         | FEP, CTX, CRO, CAZ                                                      | CFX                                                                         |             | GEN, TOB        |               | LVX, CIP         | SXT                       | ATM         |                | TET           | CLO      | FOF              |            | 17                                         | 10                                                                                  | W                        |
| 33      | AMP, PIP    | SAM                                     | TZP                                                     | FEP, CTX, CRO, CAZ                                                      | CFX                                                                         |             | AMK, GEN, TOB   |               | LVX, CIP         | SXT                       | ATM         |                | TET           |          |                  |            | 17                                         | 10                                                                                  | W                        |
| 61      | AMP, PIP    | SAM                                     |                                                         | FEP, CTX, CRO, CAZ                                                      | CFX                                                                         |             | AMK, GEN, TOB   |               | LVX, CIP         | SXT                       | ATM         |                | TET           | CLO      |                  |            | 17                                         | 10                                                                                  | W                        |
| 128     | AMP, PIP    | SAM                                     |                                                         | FEP, CTX, CRO, CAZ                                                      | CFX                                                                         |             | AMK, GEN, TOB   |               | LVX, CIP         | SXT                       | ATM         |                | TET           | CLO      |                  |            | 17                                         | 10                                                                                  | M                        |
| 27      | AMP, PIP    | SAM                                     | TZP                                                     | FEP, CTX, CRO, CAZ                                                      | CFX                                                                         |             | AMK, TOB        |               | LVX, CIP         | SXT                       | ATM         |                | TET           |          |                  |            | 16                                         | 10                                                                                  | W                        |
| 28      | AMP, PIP    | SAM                                     | TZP                                                     | FEP, CTX, CRO, CAZ                                                      | CFX                                                                         |             | GEN, TOB        |               | LVX, CIP         |                           | ATM         |                | TET           | CLO      |                  |            | 16                                         | 10                                                                                  | M                        |
| 50      | AMP, PIP    | SAM                                     |                                                         | FEP, CTX, CRO, CAZ                                                      | CFX                                                                         |             | GEN, TOB        |               | LVX, CIP         | SXT                       | ATM         |                | TET           | CLO      |                  |            | 16                                         | 10                                                                                  | M                        |

|     |          |     |     |                    |     |  |               |  |          |      |     |  |     |     |     |     |    |    |    |
|-----|----------|-----|-----|--------------------|-----|--|---------------|--|----------|------|-----|--|-----|-----|-----|-----|----|----|----|
| 62  | AMP, PIP | SAM | TZP | FEP, CTX, CRO, CAZ | CFX |  | GEN, TOB      |  | LVX, CIP |      | ATM |  | TET | CLO |     |     | 16 | 10 | M  |
| 68  | AMP, PIP | SAM | TZP | FEP, CTX, CRO, CAZ | CFX |  | GEN, TOB      |  | LVX, CIP | SXT  | ATM |  |     | CLO |     |     | 16 | 10 | W  |
| 72  | AMP, PIP | SAM | TZP | FEP, CTX, CRO, CAZ | CFX |  | GEN, TOB      |  | LVX, CIP | SXT  | ATM |  |     | CLO |     |     | 16 | 10 | NP |
| 74  | AMP, PIP | SAM |     | FEP, CTX, CRO, CAZ | CFX |  | GEN, TOB      |  | LVX, CIP | SXT  | ATM |  | TET | CLO |     |     | 16 | 10 | M  |
| 78  | AMP, PIP | SAM | TZP | FEP, CTX, CRO, CAZ | CFX |  | AMK, TOB      |  | LVX, CIP |      | ATM |  | TET | CLO |     |     | 16 | 10 | NP |
| 93  | AMP, PIP | SAM | TZP | FEP, CTX, CRO, CAZ | CFX |  | GEN, TOB      |  | LVX, CIP | SXT, | ATM |  | TET |     |     |     | 16 | 10 | M  |
| 114 | AMP, PIP | SAM |     | FEP, CTX, CRO, CAZ | CFX |  | GEN, TOB      |  | LVX, CIP | SXT  | ATM |  | TET | CLO |     |     | 16 | 10 | M  |
| 115 | AMP, PIP | SAM |     | FEP, CTX, CRO, CAZ | CFX |  | GEN, TOB      |  | LVX, CIP | SXT  | ATM |  | TET | CLO |     |     | 16 | 10 | NP |
| 116 | AMP, PIP | SAM | TZP | FEP, CTX, CRO, CAZ | CFX |  | GEN, TOB      |  | LVX, CIP |      | ATM |  | TET | CLO |     |     | 16 | 10 | W  |
| 131 | AMP, PIP | SAM | TZP | FEP, CTX, CRO, CAZ | CFX |  | GEN, TOB      |  | LVX, CIP |      | ATM |  | TET |     | FOF |     | 16 | 10 | W  |
| 135 | AMP, PIP | SAM | TZP | FEP, CTX, CRO, CAZ | CFX |  | GEN, TOB      |  | LVX, CIP | SXT  | ATM |  | TET |     |     |     | 16 | 10 | NP |
| 32  | AMP, PIP |     | TZP | FEP, CTX, CRO, CAZ | CFX |  | GEN           |  | LVX, CIP | SXT  | ATM |  | TET | CLO |     |     | 15 | 10 | NP |
| 34  | AMP, PIP | SAM | TZP | FEP, CTX, CRO, CAZ | CFX |  | TOB           |  | LVX, CIP |      | ATM |  | TET | CLO |     |     | 15 | 10 | W  |
| 73  | AMP, PIP | SAM | TZP | FEP, CTX, CRO, CAZ | CFX |  | TOB           |  | LVX, CIP | SXT  | ATM |  | TET |     |     |     | 15 | 10 | NP |
| 129 | AMP, PIP | SAM | TZP | FEP, CTX, CRO, CAZ | CFX |  | TOB           |  | LVX, CIP | SXT  | ATM |  | TET |     |     |     | 15 | 10 | M  |
| 136 | AMP, PIP | SAM | TZP | FEP, CTX, CRO, CAZ | CFX |  |               |  | LVX, CIP | SXT  | ATM |  | TET |     |     |     | 14 | 10 | S  |
| 38  | AMP, PIP | SAM | TZP | FEP, CTX, CRO, CAZ | CFX |  | AMK, GEN, TOB |  | LVX, CIP |      | ATM |  | TET |     |     |     | 16 | 9  | W  |
| 52  | AMP, PIP | SAM |     | FEP, CTX, CRO, CAZ | CFX |  | AMK, GEN, TOB |  | LVX, CIP | SXT  | ATM |  | TET |     |     |     | 16 | 9  | W  |
| 20  | AMP, PIP | SAM | TZP | FEP, CTX, CRO, CAZ | CFX |  | GEN, TOB      |  | LVX, CIP |      | ATM |  | TET |     |     |     | 15 | 9  | M  |
| 22  | AMP, PIP | SAM |     | FEP, CTX, CRO, CAZ | CFX |  | GEN, TOB      |  | LVX, CIP |      | ATM |  | TET | CLO |     |     | 15 | 9  | M  |
| 37  | AMP, PIP | SAM | TZP | FEP, CTX, CRO, CAZ | CFX |  | AMK, TOB      |  | LVX, CIP |      | ATM |  | TET |     |     |     | 15 | 9  | NP |
| 48  | AMP, PIP | SAM | TZP | FEP, CTX, CRO, CAZ | CFX |  | GEN, TOB      |  | LVX, CIP |      | ATM |  | TET |     |     |     | 15 | 9  | W  |
| 49  | AMP, PIP | SAM |     | FEP, CTX, CRO, CAZ | CFX |  | GEN, TOB      |  | LVX, CIP |      | ATM |  | TET | CLO |     |     | 15 | 9  | M  |
| 89  | AMP, PIP | SAM |     | FEP, CTX, CRO, CAZ | CFX |  | GEN, TOB      |  | LVX, CIP | SXT  | ATM |  | TET |     |     |     | 15 | 9  | NP |
| 97  | AMP, PIP | SAM |     | FEP, CTX, CRO, CAZ | CFX |  | GEN, TOB      |  | LVX, CIP | SXT  | ATM |  | TET |     |     |     | 15 | 9  | M  |
| 117 | AMP, PIP | SAM | TZP | FEP, CTX, CRO, CAZ | CFX |  | GEN, TOB      |  | LVX, CIP |      | ATM |  |     |     | FOF |     | 15 | 9  | W  |
| 133 | AMP, PIP | SAM |     | FEP, CTX, CRO, CAZ | CFX |  | AMK, TOB      |  | LVX, CIP | SXT  | ATM |  | TET |     |     |     | 15 | 9  | NP |
| 139 | AMP, PIP | SAM |     | FEP, CTX, CRO, CAZ | CFX |  | GEN, TOB      |  | LVX, CIP | SXT  | ATM |  |     | CLO |     |     | 15 | 9  | M  |
| 7   | AMP, PIP |     |     | FEP, CTX, CRO, CAZ | CFX |  |               |  | LVX, CIP | SXT  | ATM |  | TET | CLO |     | CST | 14 | 9  | M  |
| 19  | AMP, PIP | SAM |     | FEP, CTX, CRO, CAZ | CFX |  | GEN, TOB      |  |          | SXT  | ATM |  | TET | CLO |     |     | 14 | 9  | W  |
| 21  | AMP, PIP | SAM |     | FEP, CTX, CRO, CAZ | CFX |  |               |  | LVX, CIP | SXT  | ATM |  | TET | CLO |     |     | 14 | 9  | M  |
| 70  | AMP, PIP | SAM |     | FEP, CTX, CRO, CAZ | CFX |  |               |  | LVX, CIP | SXT  | ATM |  | TET | CLO |     |     | 14 | 9  | S  |
| 54  | AMP, PIP | SAM | TZP | FEP, CTX, CRO, CAZ | CFX |  | GEN, TOB      |  | LVX, CIP |      |     |  | TET | CLO |     |     | 14 | 9  | W  |

|     |          |     |     |                    |     |     |               |     |          |     |     |  |     |     |  |  |    |   |    |
|-----|----------|-----|-----|--------------------|-----|-----|---------------|-----|----------|-----|-----|--|-----|-----|--|--|----|---|----|
| 64  | AMP, PIP | SAM |     | FEP, CTX, CRO, CAZ | CFX |     |               |     | LVX, CIP | SXT | ATM |  | TET | CLO |  |  | 14 | 9 | S  |
| 66  | AMP, PIP | SAM | TZP | FEP, CTX, CRO, CAZ | CFX |     | TOB           |     | LVX, CIP |     | ATM |  | TET |     |  |  | 14 | 9 | M  |
| 86  | AMP, PIP | SAM |     | FEP, CTX, CRO, CAZ | CFX |     | TOB           |     | LVX, CIP | SXT | ATM |  |     | CLO |  |  | 14 | 9 | NP |
| 91  | AMP, PIP | SAM | TZP | FEP, CTX, CRO, CAZ | CFX |     | TOB           |     | LVX, CIP | SXT | ATM |  |     |     |  |  | 14 | 9 | W  |
| 95  | AMP, PIP | SAM |     | FEP, CTX, CRO, CAZ | CFX |     | TOB           |     | LVX, CIP | SXT | ATM |  |     | CLO |  |  | 14 | 9 | W  |
| 108 | AMP, PIP | SAM | TZP | FEP, CTX, CRO, CAZ | CFX |     | TOB           |     | LVX, CIP |     | ATM |  | TET |     |  |  | 14 | 9 | S  |
| 112 | AMP, PIP | SAM |     | FEP, CTX, CRO, CAZ | CFX |     | TOB           |     | LVX, CIP | SXT | ATM |  | TET |     |  |  | 14 | 9 | S  |
| 5   | AMP, PIP | SAM |     | FEP, CTX, CRO,CAZ  | CFX | CTT |               |     | LVX, CIP |     | ATM |  | TET | CLO |  |  | 13 | 9 | W  |
| 81  | AMP, PIP | SAM | TZP | FEP, CTX, CRO, CAZ | CFX |     |               |     |          | SXT | ATM |  | TET | CLO |  |  | 13 | 9 | M  |
| 36  | AMP, PIP | SAM | TZP | FEP, CTX, CRO, CAZ | CFX |     | AMK, GEN, TOB |     | LVX, CIP |     | ATM |  |     |     |  |  | 15 | 8 | M  |
| 41  | AMP, PIP | SAM | TZP | FEP, CTX, CRO, CAZ | CFX |     | AMK, GEN      |     | LVX, CIP |     | ATM |  |     |     |  |  | 15 | 8 | M  |
| 2   | AMP, PIP | SAM | TZP | FEP, CTX, CRO, CAZ | CFX |     | AMK, TOB      |     | LVX, CIP |     | ATM |  |     |     |  |  | 14 | 8 | W  |
| 26  | AMP, PIP | SAM | TZP | FEP, CTX, CRO, CAZ | CFX |     | GEN, TOB      |     | LVX, CIP |     | ATM |  |     |     |  |  | 14 | 8 | W  |
| 55  | AMP, PIP | SAM |     | FEP, CTX, CRO, CAZ | CFX |     | GEN, TOB      |     | LVX, CIP |     | ATM |  |     | CLO |  |  | 14 | 8 | M  |
| 63  | AMP, PIP | SAM |     | FEP, CTX, CRO, CAZ | CFX |     | GEN, TOB      |     | LVX, CIP |     | ATM |  | TET |     |  |  | 14 | 8 | M  |
| 113 | AMP, PIP | SAM |     | FEP, CTX, CRO, CAZ | CFX |     | GEN, TOB      |     | LVX, CIP |     | ATM |  |     | CLO |  |  | 14 | 8 | NP |
| 119 | AMP, PIP | SAM | TZP | FEP, CTX, CRO, CAZ | CFX |     | GEN, TOB      |     | LVX, CIP |     | ATM |  |     |     |  |  | 14 | 8 | W  |
| 127 | AMP, PIP | SAM |     | FEP, CTX, CRO, CAZ | CFX |     | GEN, TOB      |     | LVX, CIP |     | ATM |  | TET |     |  |  | 14 | 8 | W  |
| 10  | AMP, PIP | SAM |     | FEP, CTX, CRO, CAZ | CFX |     |               |     | LVX, CIP | SXT | ATM |  | TET |     |  |  | 13 | 8 | M  |
| 15  | AMP, PIP | SAM |     | FEP, CTX, CRO, CAZ | CFX |     |               |     | LVX, CIP | SXT | ATM |  | TET |     |  |  | 13 | 8 | W  |
| 25  | AMP, PIP |     |     | FEP, CTX, CRO, CAZ | CFX |     |               |     | LVX, CIP | SXT | ATM |  | TET | CLO |  |  | 13 | 8 | NP |
| 43  | AMP, PIP | SAM |     | FEP, CTX, CRO, CAZ | CFX |     | TOB           |     | LVX, CIP | SXT | ATM |  |     |     |  |  | 13 | 8 | W  |
| 60  | AMP, PIP | SAM |     | FEP, CTX, CRO, CAZ | CFX |     | TOB           |     | LVX, CIP |     | ATM |  | TET |     |  |  | 13 | 8 | M  |
| 65  | AMP, PIP | SAM |     | FEP, CTX, CRO, CAZ | CFX |     |               |     | LVX, CIP | SXT | ATM |  | TET |     |  |  | 13 | 8 | W  |
| 71  | AMP, PIP | SAM |     | FEP, CTX, CRO, CAZ | CFX |     |               |     | LVX, CIP | SXT | ATM |  | TET |     |  |  | 13 | 8 | S  |
| 80  | AMP, PIP | SAM |     | FEP, CTX, CRO, CAZ | CFX |     |               |     | LVX, CIP | SXT | ATM |  | TET |     |  |  | 13 | 8 | M  |
| 110 | AMP, PIP | SAM |     | FEP, CTX, CRO, CAZ | CFX |     |               |     | LVX, CIP | SXT | ATM |  | TET |     |  |  | 13 | 8 | NP |
| 47  | AMP, PIP | SAM | TZP |                    |     |     |               | ERT | LVX, CIP | SXT |     |  | TET | CLO |  |  | 10 | 8 | M  |
| 88  | AMP, PIP | SAM |     | FEP, CTX, CRO, CAZ | CFX |     | GEN, TOB      |     | LVX, CIP |     | ATM |  |     |     |  |  | 13 | 7 | W  |
| 40  | AMP, PIP |     |     | FEP, CTX, CRO, CAZ | CFX |     |               |     | LVX, CIP | SXT | ATM |  | TET |     |  |  | 12 | 7 | M  |
| 56  | AMP, PIP |     |     | FEP, CTX, CRO, CAZ | CFX |     | GEN           |     | LVX, CIP | SXT | ATM |  |     |     |  |  | 12 | 7 | M  |
| 92  | AMP, PIP |     | TZP | FEP, CTX, CRO, CAZ | CFX |     |               |     | LVX, CIP |     | ATM |  |     | CLO |  |  | 12 | 7 | W  |
| 96  | AMP, PIP | SAM |     | FEP, CTX, CRO, CAZ | CFX |     |               |     | LVX, CIP | SXT | ATM |  |     |     |  |  | 12 | 7 | NP |

|     |          |     |  |                    |     |  |          |  |          |     |     |  |     |     |  |  |    |   |    |
|-----|----------|-----|--|--------------------|-----|--|----------|--|----------|-----|-----|--|-----|-----|--|--|----|---|----|
| 106 | AMP, PIP |     |  | FEP, CTX, CRO, CAZ | CFX |  |          |  | LVX, CIP | SXT | ATM |  | TET |     |  |  | 12 | 7 | NP |
| 124 | AMP, PIP |     |  | FEP, CTX, CRO, CAZ | CFX |  | GEN      |  | LVX, CIP | SXT | ATM |  |     |     |  |  | 12 | 7 | M  |
| 101 | AMP, PIP | SAM |  | FEP, CTX, CRO, CAZ | CFX |  |          |  |          | SXT | ATM |  | TET |     |  |  | 11 | 7 | S  |
| 105 | AMP, PIP | SAM |  | FEP, CTX, CRO, CAZ | CFX |  |          |  |          | SXT | ATM |  | TET |     |  |  | 11 | 7 | M  |
| 107 | AMP, PIP | SAM |  | FEP, CTX, CRO, CAZ | CFX |  |          |  |          |     | ATM |  | TET | CLO |  |  | 11 | 7 | M  |
| 143 | AMP, PIP |     |  | FEP, CTX, CRO, CAZ | CFX |  |          |  |          | SXT | ATM |  | TET | CLO |  |  | 11 | 7 | NP |
| 4   | AMP, PIP | SAM |  |                    | CFX |  | TOB      |  | LVX, CIP | SXT |     |  | TET |     |  |  | 9  | 7 | NP |
| 39  | AMP, PIP |     |  | FEP, CTX, CRO, CAZ | CFX |  |          |  | LVX, CIP |     | ATM |  | TET |     |  |  | 11 | 6 | W  |
| 67  | AMP, PIP |     |  | FEP, CTX, CRO, CAZ | CFX |  |          |  | LVX, CIP |     | ATM |  | TET |     |  |  | 11 | 6 | M  |
| 122 | AMP, PIP | SAM |  |                    |     |  | GEN, TOB |  | LVX, CIP | SXT |     |  |     | CLO |  |  | 9  | 6 | W  |
| 53  | AMP, PIP | SAM |  |                    |     |  |          |  | LVX, CIP | SXT |     |  | TET | CLO |  |  | 8  | 6 | W  |
| 121 | AMP, PIP | SAM |  |                    |     |  |          |  | LVX, CIP | SXT |     |  | TET | CLO |  |  | 8  | 6 | S  |

AMP: Ampicillin, PIP: Piperacicllin, SAM: Ampicillin/sulbactam, TZP: Piperacillin/tazobactam, FEP: Cefepime, CTX: Cetofaxime, CRO: Ceftriaxone, CAZ: Ceftazidime, CFX: Cefuroxime, CTT: Cefotetan, AMK: Amikacin, GEN: Gentamicin, TOB: Tobramycin, MEM: Meropenem, IPM: Imipenem, ETP: Ertapenem, LVX: Levofloxacin, CIP: Ciprofloxacin, SXT: Trimethoprim/sulfamethoxazole, ATM: Aztreonam, TGG: Tigecycline, TET: tetracycline, CLO: Chloramphenicol, FOF: Fosfomycin, CST: Colistin. NP: No producer, W: weak, M: moderate, S: strong.
